# Supplementary material for: Prioritizing replay when future goals are unknown
Source: PubMed Central journal article supplement — bioRxiv. 2025 Jun 27:2024.02.29.582822. Originally published 2024 Mar 4. Preprint. [Version 2] doi: 10.1101/2024.02.29.582822 (PMC10942393; doi:10.1101/2024.02.29.582822), 2025-06-27
Supplement: NIHPP2024.02.29.582822V1-supplement-1.pdf [file NIHPP2024.02.29.582822V1-supplement-1.pdf]

## Appendix A. Supplement

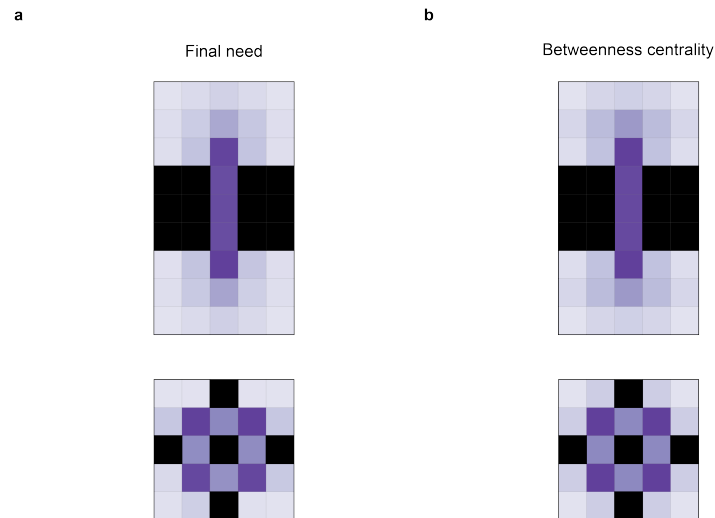

Figure A.6: **Need metric captures important elements of environment topology.** (a) Examples of final need, reproduced from Fig. 2. (b) Betweenness-centrality computed for the bottleneck chamber (top) and the community graph maze (bottom).

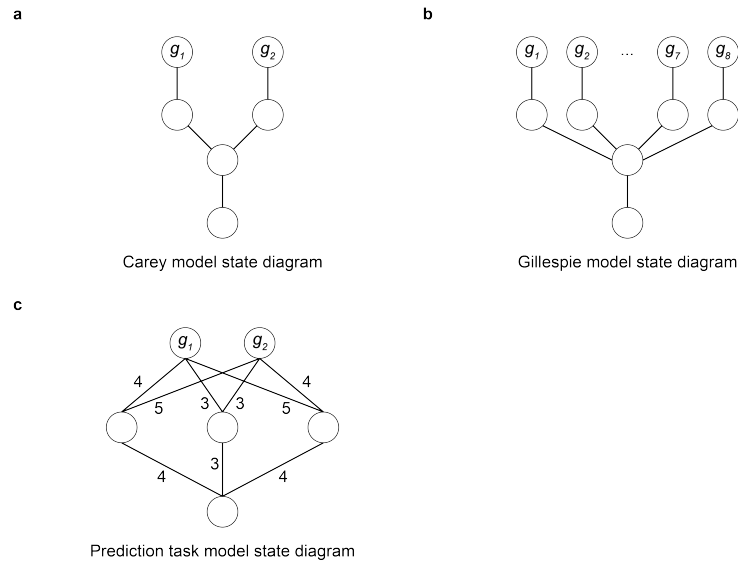

Figure A.7: **State diagrams for the simulations in Sections 3.2 and 3.3.** (a) State diagram for our model of Carey et al. [35] (b) State diagram for our model of Gillespie et al. [32] (c) State diagram for our model of the prediction task in Section 3.3. Numbers indicate distances (e.g., the left bottleneck state requires four steps to reach  $g_1$ ), which are implemented through intermediate states (not shown).
